**eTable.**Principal Components Factor Analysis for the Assessment of Theta Coefficients<sup>a</sup>

| IT-FDI Question | Factor 1: IT-FDI P | Factor 2: IT-FDI S |
|-----------------|--------------------|--------------------|
| 1               | .76                | .15                |
| 2               | .76                | .29                |
| 3               | .78                | .08                |
| 4               | .63                | .01                |
| 5               | .79                | .004               |
| 6               | .18                | .78                |
| 7               | .11                | .84                |
| 8               | -.05               | .75                |
| 9               | .30                | .45                |
| 10              | .13                | .36                |

<sup>a</sup> Data from 100 participants were included in the principal component factor analysis. IT-FDI=Italian version of the Facial Disability Index, IT-FDI P=physical function subscale of the IT-FDI, IT-FDI S=social/well-being function subscale of the IT-FDI.
